# Supplementary material for: A sustainable approach for the adsorption of methylene blue from an aqueous background: an adsorbent based on DES/CGS modified GO@ZrO2
Source: Royal Society of Chemistry journal article supplement (doi:10.1039/d3su00236e), 2023-01-01
Supplement: d3su00236e1.pdf [file d3su00236e1.pdf]

## A Sustainable Approach for the Adsorption of Methylene Blue from Aqueous

### Background: Adsorbent Based On DES/CGS Modified GO@ZrO<sub>2</sub>

Vishwajit Chavda<sup>a</sup>, Brijesh Patel<sup>a</sup>, Sneha Singh<sup>a</sup>, Darshna Hirpara<sup>a</sup>, V. Devi Rajeswari<sup>b</sup>, and Sanjeev Kumar<sup>a\*</sup>

<sup>a</sup>Applied Chemistry Department, Faculty of Technology & Engineering, The Maharaja Sayajirao University of Baroda, Vadodara – 390 002, India.

<sup>b</sup>Department of Biomedical Sciences, School of Biosciences and Technology, VIT University, Vellore – 14, Tamil Nadu, India

---

## Supporting Information

### Table of Contents

#### ➤ **Figures:**

- **Fig S1:** XRD of pure GO and ZrO<sub>2</sub>
- **Fig S2:** Variation of  $\log(Q_e - Q_t)$  vs  $t$  and fitted data of Pseudo-first order kinetic model: a) DES-GO@ZrO<sub>2</sub> (2 mg/ml dosage, 20 ml solution of MB), and b) CGS-GO@ZrO<sub>2</sub> (10 mg/ml dosage, 20 ml solution of MB) at 30±0.1°C.
- **Fig S3:** Variation of  $t/Q_t$  vs  $t$  and fitted data of Pseudo-second order kinetic model: a) DES-GO@ZrO<sub>2</sub> (2 mg/ml dosage, 20 ml solution of MB), and b) CGS-GO@ZrO<sub>2</sub> (10 mg/ml dosage, 20 ml solution of MB) at 30±0.1°C.
- **Fig S4:** Variation of  $Q_t$  vs  $t^{1/2}$  and fitted data of Intraparticle diffusion kinetic model: a) DES-GO@ZrO<sub>2</sub> (2 mg/ml dosage, 20 ml solution of MB), and b) CGS-GO@ZrO<sub>2</sub> (10 mg/ml dosage, 20 ml solution of MB) at 30±0.1°C.
- **Fig S5:** Variation of  $\log Q_e$  vs  $\log C_e$  and fitted Freundlich isotherm model for DES-GO@ZrO<sub>2</sub> (2 mg/ml dosage, 20 ml solution of MB), and CGS-GO@ZrO<sub>2</sub> (10 mg/ml dosage, 20 ml solution of MB) at 30±0.1°C.
- **Fig S6:** Variation of  $1/Q_e$  vs  $1/C_e$  and fitted Langmuir isotherm model for DES-GO@ZrO<sub>2</sub> (2 mg/ml dosage, 20 ml solution of MB), and CGS-GO@ZrO<sub>2</sub> (10 mg/ml dosage, 20 ml solution of MB) at 30±0.1°C.
- **Fig S7:** Variation of  $Q_e$  vs  $\log C_e$  and fitted Temkin isotherm model for DES-GO@ZrO<sub>2</sub> (2 mg/ml dosage, 20 ml solution of MB), and CGS-GO@ZrO<sub>2</sub> (10 mg/ml dosage, 20 ml solution of MB) at 30±0.1°C.
- **Fig S8:** Desorption study of MB from DES-GO@ZrO<sub>2</sub> using 50 ml of various solvents.

#### ➤ **Table:**

- **Table S1:** EDX elemental data of modified GO@ZrO<sub>2</sub> with CGS and DES.

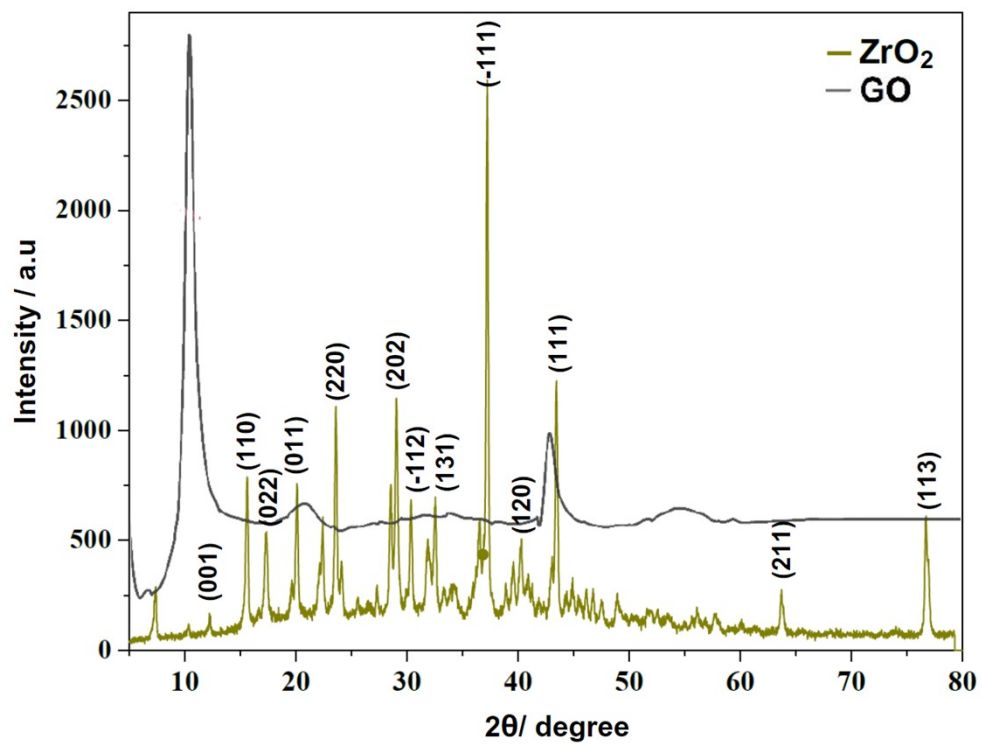

**Fig S1:** XRD of pure GO and ZrO<sub>2</sub>.

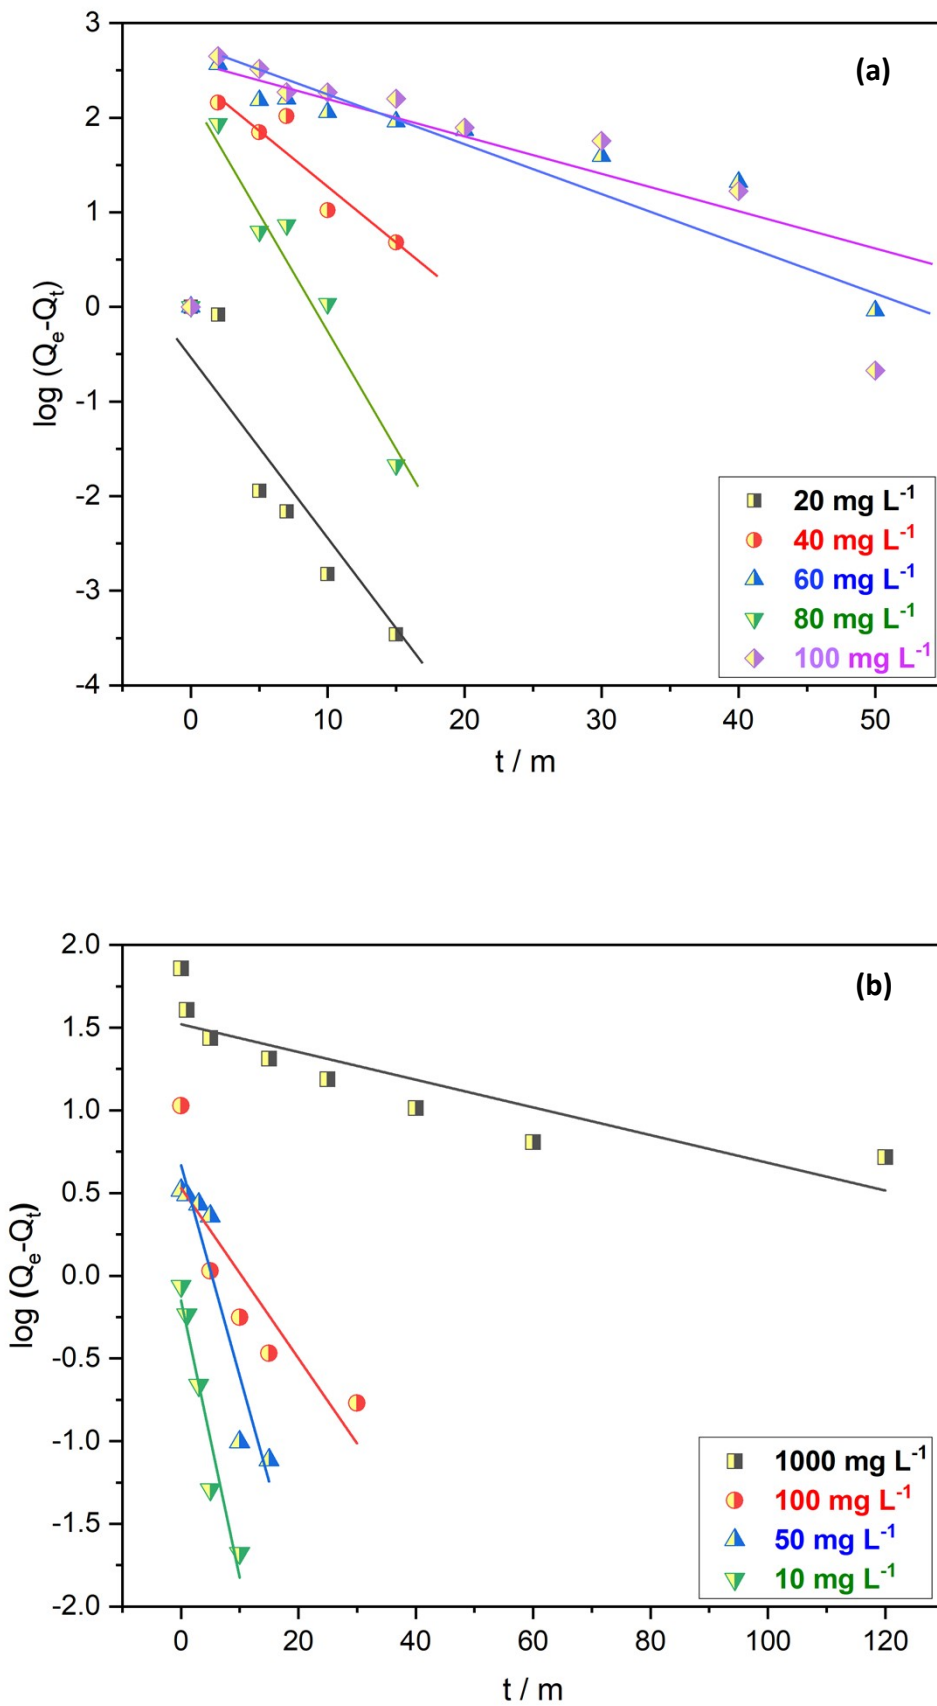

**Fig S2:** Variation of  $\log(Q_e - Q_t)$  vs  $t$  and fitted data of Pseudo-first order kinetic model: a) DES-GO@ZrO<sub>2</sub> (2 mg/ml dosage, 20 ml solution of MB), and b) CGS-GO@ZrO<sub>2</sub> (10 mg/ml dosage, 20 ml solution of MB) at 30±0.1°C.

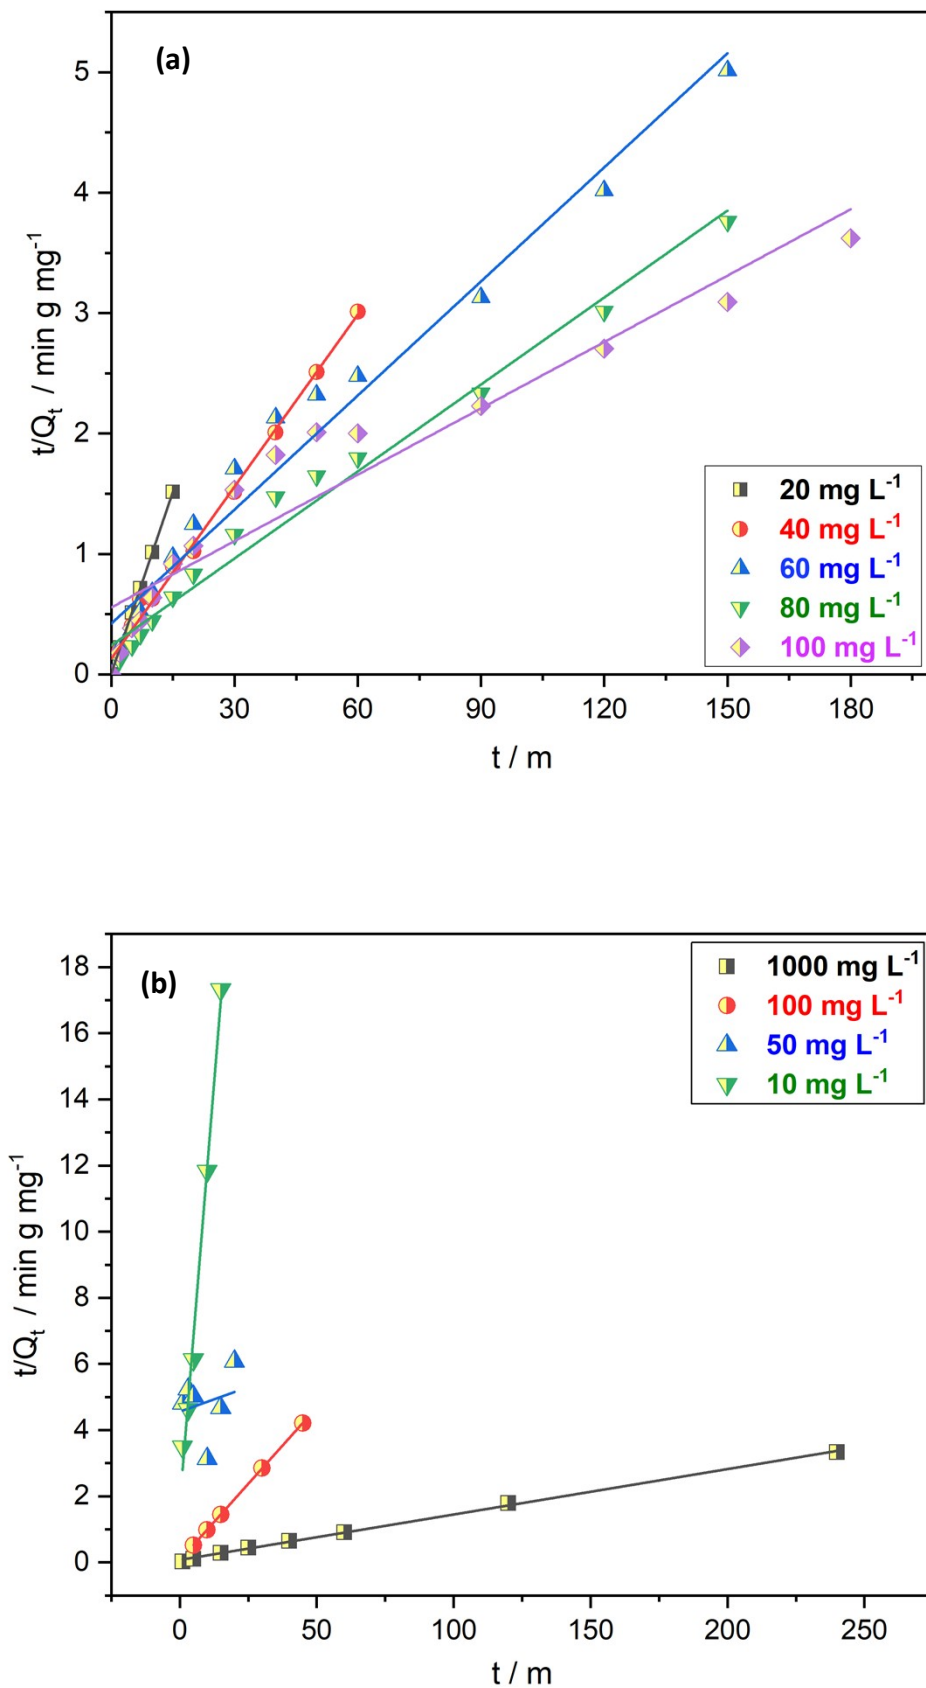

**Fig S3:** Variation of  $t/Q_t$  vs  $t$  and fitted data of Pseudo-second order kinetic model: a) DES-GO@ZrO<sub>2</sub> (2 mg/ml dosage, 20 ml solution of MB), and b) CGS-GO@ZrO<sub>2</sub> (10 mg/ml dosage, 20 ml solution of MB) at 30±0.1°C.

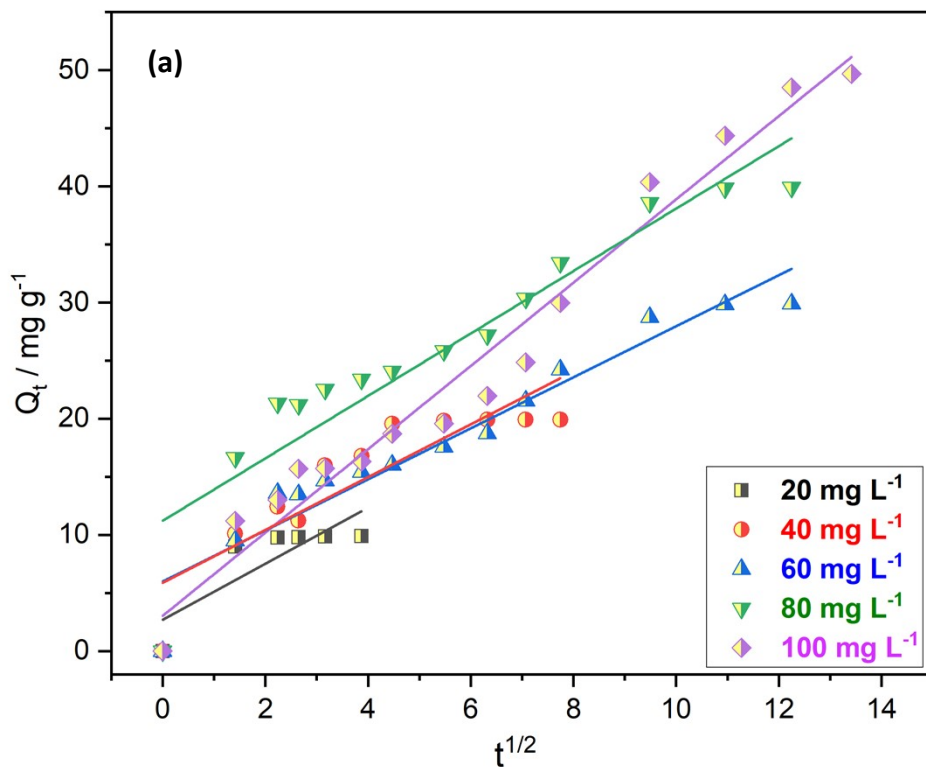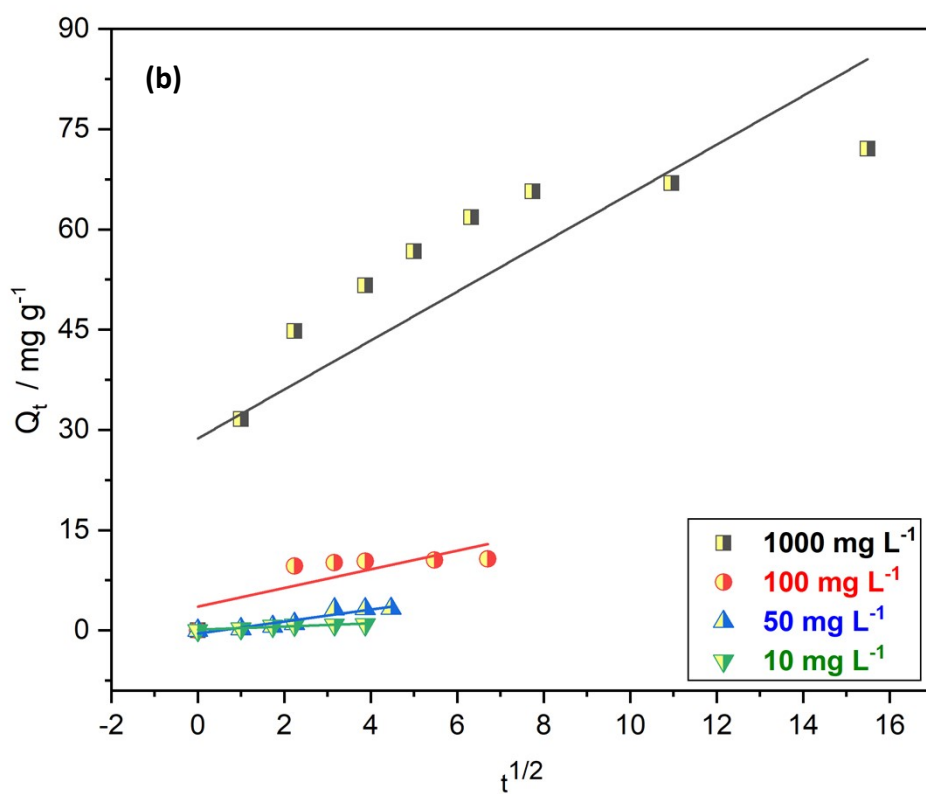

**Fig S4:** Variation of  $Q_t$  vs  $t^{1/2}$  and fitted data of Intraparticle diffusion kinetic model: a) DES-GO@ZrO<sub>2</sub> (2 mg/ml dosage, 20 ml solution of MB), and b) CGS-GO@ZrO<sub>2</sub> (10 mg/ml dosage, 20 ml solution of MB) at  $30 \pm 0.1^\circ\text{C}$ .

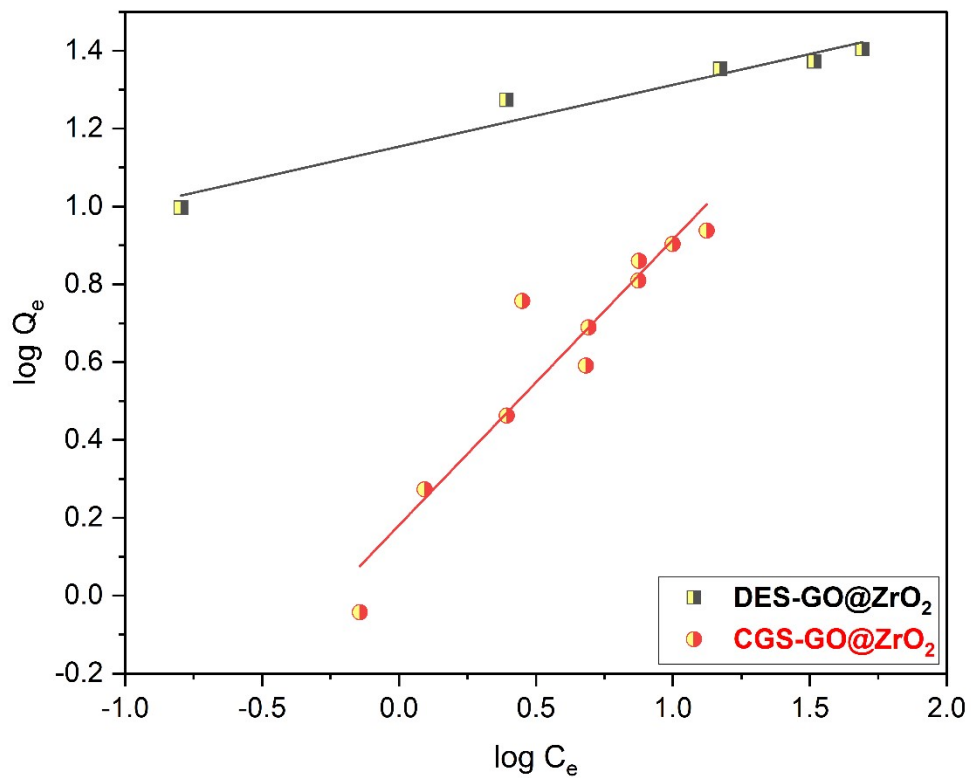

**Fig S5:** Variation of  $\log Q_e$  vs  $\log C_e$  and fitted Freundlich isotherm model for DES-GO@ZrO<sub>2</sub> (2 mg/ml dosage, 20 ml solution of MB), and CGS-GO@ZrO<sub>2</sub> (10 mg/ml dosage, 20 ml solution of MB) at  $30 \pm 0.1^\circ\text{C}$ .

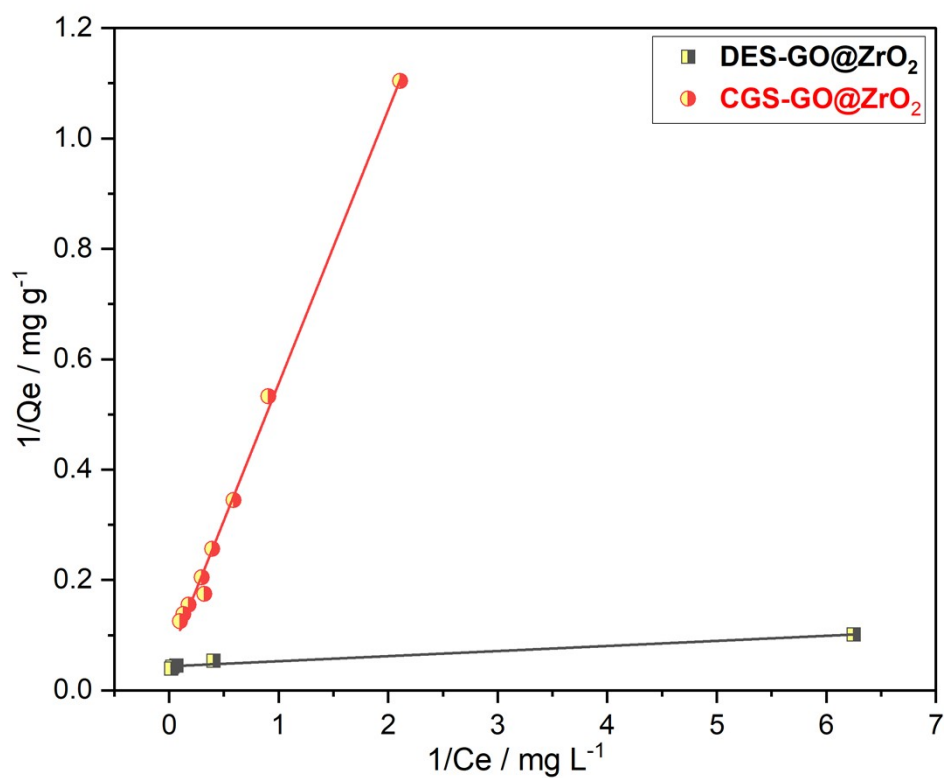

**Fig S6:** Variation of  $1/Q_e$  vs  $1/C_e$  and fitted Langmuir isotherm model for DES-GO@ZrO<sub>2</sub> (2 mg/ml dosage, 20 ml solution of MB), and CGS-GO@ZrO<sub>2</sub> (10 mg/ml dosage, 20 ml solution of MB) at  $30 \pm 0.1^\circ\text{C}$ .

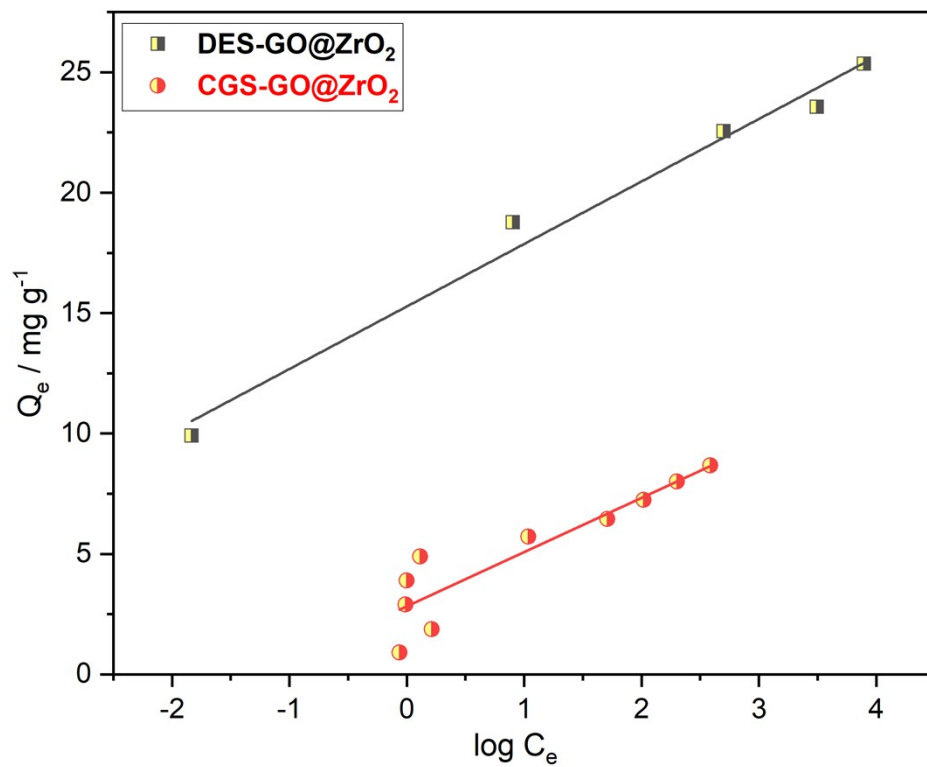

**Fig S7:** Variation of  $Q_e$  vs  $\log C_e$  and fitted Temkin isotherm model for DES-GO@ZrO<sub>2</sub> (2 mg/ml dosage, 20 ml solution of MB), and CGS-GO@ZrO<sub>2</sub> (10 mg/ml dosage, 20 ml solution of MB) at  $30 \pm 0.1^\circ\text{C}$ .



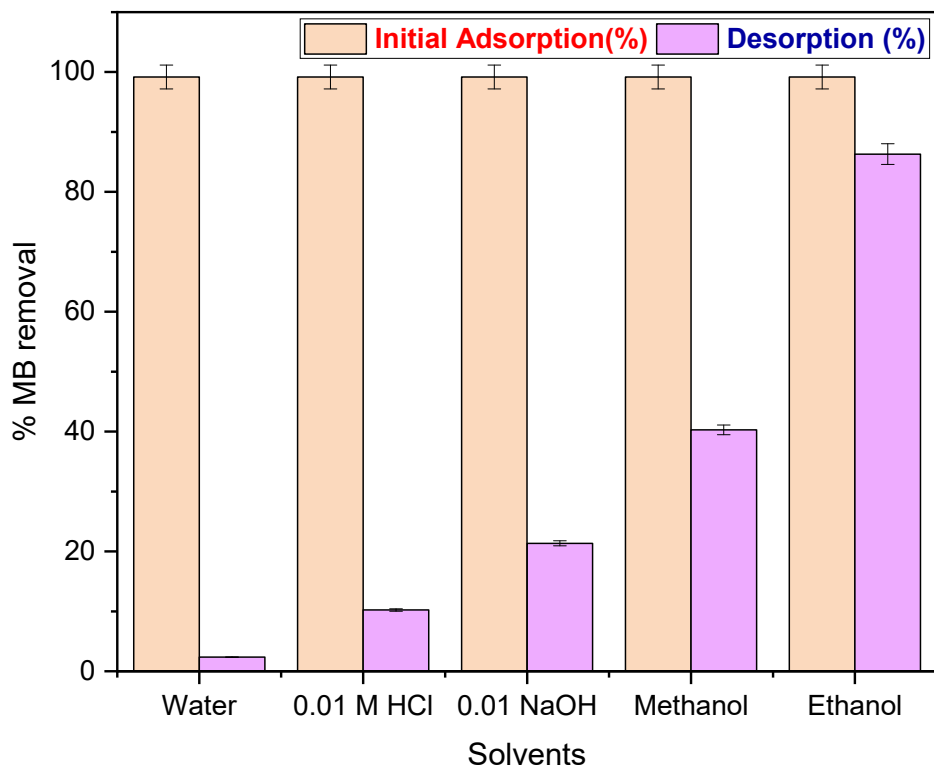

**Fig S8:** Desorption study of MB from DES-GO@ZrO<sub>2</sub> using 50 ml of various solvents.

**Table S1:** EDX elemental data of modified GO@ZrO<sub>2</sub> with CGS and DES.

| Elements  | GO@ZrO <sub>2</sub> |          | CGS-GO@ZrO <sub>2</sub> |          | DES-GO@ZrO <sub>2</sub> |          |
|-----------|---------------------|----------|-------------------------|----------|-------------------------|----------|
|           | Weight %            | Atomic % | Weight %                | Atomic % | Weight %                | Atomic % |
| <b>C</b>  | 42.43               | 60.75    | 50.76                   | 69.58    | 52.48                   | 68.22    |
| <b>O</b>  | 30.22               | 33.94    | 25.58                   | 25.75    | 23.52                   | 26.30    |
| <b>Zr</b> | 27.35               | 5.31     | 23.66                   | 4.67     | 22.75                   | 4.48     |
| <b>N</b>  | -                   | -        | -                       | -        | 0.96                    | 0.58     |
| <b>Cl</b> | -                   | -        | -                       | -        | 0.29                    | 0.42     |
